# Supplementary material
Source: publisher figshare collection journal article supplement (https://brill.figshare.com/ndownloader/files/12260192)
Supplement: Supplementary file 1 [file 12260192]

## **Floral Arrangements: Compilations of Saints' Lives in Early Modern Europe**

*Jonathan E. Greenwood*

McGill University

### **Supplementary Appendix**

#### **Contents of Flowers by Alonso de Villegas and Pedro de Ribadeneyra**

Villegas Part 1 = Alonso de Villegas, *Flos sanctorum y historia general*. 2 vols. Madrid, 1588.

Villegas Part 3 = Alonso de Villegas, *Flos sanctorum, Tercera parte*. 2 vols. Toledo, 1589.

Ribadeneyra (1599-1601) = Pedro de Ribadeneyra, *Flos sanctorum, o libro de las vidas de santos*. 2 vols. Madrid, 1599-1601.

Ribadeneyra (1604) = Pedro de Ribadeneyra, *Flos sanctorum, o libro de las vidas de santos*. 2 vols. Madrid, 1604.

Ribadeneyra (1610) = Pedro de Ribadeneyra, *Flos sanctorum, o libro de las vidas de santos*. 2 vols. Madrid, 1610.

E = Placed among the wanderers (*extravagantes*) in Ribadeneyra's flower

OFM = Order of Friars Minor, Franciscans

OP = Order of Preachers, Dominicans

SJ = Society of Jesus, Jesuits

X = Contained within the flower by Villegas and Ribadeneyra

X t = Contained within the flower by Villegas as an entry found in the revised liturgy

X \* = Entries in Ribadeneyra's flower designated as wanderers, but inserted into the liturgical calendar (1604 only)

| Name of Saint                                           | Type                          | Feast Day | Villegas<br>Part 1 | Villegas<br>Part 3 | Ribadeneyra<br>(1599-1601) | Ribadeneyra<br>(1604) | Ribadeneyra<br>(1610) |
|---------------------------------------------------------|-------------------------------|-----------|--------------------|--------------------|----------------------------|-----------------------|-----------------------|
| Circumcision of Jesus (or<br>the Blessed Name of Jesus) |                               | January 1 | X t                |                    | X                          | X                     | X                     |
| Odilo                                                   | Abbot, Confessor              | January 1 |                    |                    |                            | E                     | E                     |
| Eufrosina                                               | Virgin                        | January 1 |                    |                    |                            |                       | E                     |
| Macharius                                               | Monk (Egypt)                  | January 2 |                    | X                  |                            |                       | E                     |
| Fulgentius                                              | Bishop of Ruspe,<br>Confessor | January 2 |                    | X                  |                            |                       | E                     |
| Genobesa                                                | Virgin                        | January 3 |                    |                    |                            |                       | E                     |
| Edward the Confessor                                    | King of England,<br>Confessor | January 4 |                    | X                  |                            |                       | E                     |
| Angela de Fulgino                                       | OFM                           | January 4 |                    | X                  |                            |                       |                       |
| Apollinaria                                             | Virgin                        | January 5 |                    | X                  |                            |                       |                       |
| Teresa López                                            | Married ( <i>casada</i> )     | January 5 |                    | X                  |                            |                       |                       |
| Simeon the Anchorite                                    | Confessor                     | January 5 | X                  |                    |                            |                       | E                     |
| Telesphorus                                             | Pope, Martyr                  | January 5 |                    |                    |                            | X                     | X                     |
| Epiphany                                                |                               | January 6 | X t                |                    | X                          | X                     | X                     |

|                         |                                    |            |     |   |   |   |   |
|-------------------------|------------------------------------|------------|-----|---|---|---|---|
| Hermenold               | Abbot                              | January 6  |     | X |   |   |   |
| Honoratus               | Founder of Lérins Abbey, Confessor | January 6  |     | X |   |   |   |
| Andrea Corsini          | Bishop of Fiesole, Carmelite       | January 6  |     | X |   |   | E |
| Lorenzo Giustiniani     | Patriarch of Venice, Confessor     | January 8  |     | X |   |   | E |
| Fulgentius              | Bishop of Ecija, Confessor         | January 8  | X   |   |   | E |   |
| Raymundo de Peñaforte   | OP, Confessor                      | January 8  | X   |   |   |   | E |
| Gudula                  | Virgin                             | January 8  |     |   |   |   | E |
| Julian, Basilisa et al. |                                    | January 9  | X   |   |   | E | E |
| Gonzalo de Amarante     | OP, Confessor                      | January 10 | X   |   |   |   |   |
| Theodosius              | Cenobite                           | January 11 |     | X |   |   | E |
| Higinus                 | Pope, Martyr                       | January 11 | X t |   | X | X | X |
| Victorinus              | Abbot                              | January 12 | X   |   |   |   |   |
| Martin                  | Confessor, Doctor in León          | January 12 | X   |   |   |   |   |

|                                                   |                                |            |     |   |   |   |   |
|---------------------------------------------------|--------------------------------|------------|-----|---|---|---|---|
| Gumesindus                                        | Presbyter, Martyr              | January 13 | X   |   |   |   |   |
| Servant of God                                    | Monk, Martyr                   | January 13 | X   |   |   |   |   |
| Hilary                                            | Bishop, Confessor              | January 14 | X t |   | X | X | X |
| Felix                                             | Presbyter                      | January 14 | X t |   | X | X | X |
| Paul                                              | First Hermit                   | January 15 | X t |   | X | X | X |
| John of Calibita                                  | Confessor                      | January 15 |     | X |   | E | E |
| Macharius                                         | Monk (Alexandria)              | January 15 |     | X |   |   | E |
| Maurus                                            | Abbot                          | January 15 | X t |   | X | X |   |
| Marcellus                                         | Pope, Martyr                   | January 16 | X t |   | X |   | X |
| Bonitus                                           | Bishop, Confessor              | January 15 |     |   |   |   | E |
| Berardus, Peter, Adiutus,<br>Accursius, and Othon | Martyr                         | January 16 | X   |   |   |   | E |
| Furseus                                           | Abbot                          | January 16 |     | X |   |   |   |
| Maria                                             | Monk of San Pablo<br>de Toledo | January 16 |     | X |   |   |   |
| Speusippus, Eleusippus,<br>and Meleusippus        | Martyr                         | January 17 |     | X |   |   |   |
| Anthony                                           | Abbot                          | January 17 | X t |   | X | X | X |

|                                        |                                    |            |     |   |   |   |   |
|----------------------------------------|------------------------------------|------------|-----|---|---|---|---|
| Seat of St. Peter in Rome              |                                    | January 18 | X t |   | X | X | X |
| Prisca                                 | Virgin, Martyr                     | January 18 | X t |   | X | X | X |
| Liberata and her sisters               | Martyr                             | January 18 | X   |   |   |   |   |
| Wolstan                                | Bishop, Confessor                  | January 19 |     | X |   |   |   |
| Marius, Martha, Audifax,<br>and Abacus | Martyr                             | January 19 | X t |   | X | X | X |
| Fabian                                 | Pope, Martyr                       | January 20 | X t |   | X | X | X |
| Sebastian                              | Martyr                             | January 20 | X t |   | X | X | X |
| Agnes                                  | Virgin, Martyr                     | January 21 | X t |   | X | X | X |
| Fructuose, Augurrius,<br>Eulogius      | Bishop (Fruc),<br>Martyr           | January 21 | X t |   |   |   |   |
| Vincent                                | Martyr                             | January 22 | X t |   | X | X | X |
| Anastasius                             | Martyr                             | January 22 | X t |   | X | X | X |
| Emerenciana                            | Virgin, Martyr                     | January 23 | X t |   | X | X | X |
| Clement and Agathangelo                | Bishop of Ancyra,<br>Martyr        | January 23 |     | X |   |   | E |
| Ildefonso                              | Archbishop of<br>Toledo, Confessor | January 23 | X   |   | X | X | X |

|                     |                                    |            |     |   |   |   |   |
|---------------------|------------------------------------|------------|-----|---|---|---|---|
| John Eleemosinarius | Bishop, Confessor                  | January 23 | X   |   |   | E | E |
| Babilas             | Bishop, Martyr                     | January 24 |     | X |   |   |   |
| Timotheus           | Bishop, Martyr                     | January 24 | X t |   | X | X | X |
| Descent of Our Lady | or St. Mary of Peace               | January 24 | X   |   | X | X | X |
| Preyectus           | Bishop of Averna, Martyr           | January 25 |     | X |   |   |   |
| Eusebia             | Foreigner<br>( <i>estrangera</i> ) | January 25 |     | X |   |   |   |
| Conversion of Paul  |                                    | January 25 | X t |   | X | X | X |
| Polycarp            | Bishop, Martyr                     | January 26 | X t |   | X | X | X |
| John Chrysostom     | Bishop, Confessor                  | January 27 | X t |   | X | X | X |
| Paula               | Widow                              | January 27 | X   |   |   | E | E |
| James               | Hermit, Confessor                  | January 28 |     | X |   |   | E |
| Margaret            | Princess of Hungary, Nun, OP       | January 28 |     | X |   |   | E |
| Agnes               | Second Feast                       | January 28 | X t |   |   |   |   |

|                                    |                                          |            |     |   |   |     |   |
|------------------------------------|------------------------------------------|------------|-----|---|---|-----|---|
| Julian                             | Bishop of Cuenca,<br>Confessor           | January 28 | X   |   |   | E   | E |
| Cyril                              | Patriarch of<br>Alexandria,<br>Confessor | January 28 | X   |   |   | E   | E |
| Constance                          | Bishop of Perugia,<br>Confessor          | January 29 |     | X |   |     |   |
| Valerius                           | Bishop of Zaragoza                       | January 29 | X   |   |   |     |   |
| Elesmes                            | Confessor                                | January 30 | X   |   |   |     |   |
| Adelemus                           | Confessor                                | January 30 | X   |   |   |     |   |
| Cyrus and John                     | Martyr                                   | January 31 |     | X |   |     |   |
| Marcella                           | Widow                                    | January 31 |     |   |   |     | E |
| Ignatius                           | Bishop, Martyr                           | February 1 | X t |   | X | X * | X |
| Brigit                             | Virgin                                   | February 1 | X   |   |   | E   | E |
| Ephren                             | Abbot                                    | February 1 |     | X |   |     | E |
| Severus                            | Bishop, Confessor                        | February 1 |     | X |   |     |   |
| Tryphus                            | Martyr                                   | February 1 |     | X |   |     |   |
| Purification of the Virgin<br>Mary |                                          | February 2 | X t |   | X | X   | X |
| Fray Jordan                        | OP                                       | February 3 |     | X |   |     |   |
| Blaise                             | Bishop, Martyr                           | February 3 | X t |   | X | X   | X |
| Blaise of Spain                    |                                          | February 3 | X   |   |   |     |   |

|                                   |                                     |             |     |   |   |     |   |
|-----------------------------------|-------------------------------------|-------------|-----|---|---|-----|---|
| Eleuchadius                       | Archbishop of<br>Ravena, Confessor  | February 4  |     | X |   |     |   |
| Theophilus                        | Archdeacon                          | February 4  |     | X |   |     |   |
| Agatha                            | Virgin, Martyr                      | February 5  | X t |   | X | X   | X |
| Dorothy                           | Virgin, Martyr                      | February 6  | X t |   | X | X   | X |
| Fausta, Evelasius, and<br>Maximus | Martyr                              | February 6  |     | X |   |     |   |
| Romuald                           | Abbot, Founder of<br>Camaldolesians | February 7  |     |   | X | X   | X |
| Theodorus                         | Captain, Martyr                     | February 7  |     | X |   |     | E |
| Ana de Cuellar                    | Widow                               | February 7  |     | X |   |     |   |
| Moses                             | Anchorite                           | February 7  |     |   |   |     | E |
| Eugenius and Maria                | Monk and his<br>Daughter            | February 8  |     | X |   |     |   |
| Apollonia                         | Virgin, Martyr                      | February 9  | X t |   | X | X * | X |
| Nicephorous                       | Martyr                              | February 9  |     | X |   | E   | E |
| William                           | Hermit, OSA                         | February 10 |     | X |   |     | E |
| Eulalia of Barcelona              | Virgin, Martyr                      | February 12 | X   |   |   | E   | E |
| Stephen                           | Founder of the<br>Grandimontesians  | February 13 |     | X |   |     |   |
| Martinianus                       | Confessor                           | February 13 | X t |   |   | E   | E |
| Valentine                         | Martyr                              | February 14 | X t |   | X | X   | X |
| Auxencius                         | Abbot                               | February 14 |     | X |   |     |   |
| Faustinus and Jovita              | Martyr                              | February 15 | X t |   | X | X   | X |
| Onesimus                          | Disciple of St. Paul,<br>Martyr     | February 16 |     | X |   |     |   |
| Juliana                           | Virgin, Martyr                      | February 16 |     |   |   |     | E |
| Simeon                            | Bishop, Martyr                      | February 18 | X t |   | X | X   | X |



|                              |                                  |             |     |   |   |   |                       |
|------------------------------|----------------------------------|-------------|-----|---|---|---|-----------------------|
| Heladius                     | Archbishop of Toledo, Confessor  | February 18 | X   |   |   |   |                       |
| Theotonius                   | Presbyter, Confessor             | February 18 | X   |   |   |   |                       |
| Seat of St. Peter in Antioch |                                  | February 22 | X t |   | X | X | X                     |
| Peter Damian                 | Cardinal, Confessor              | February 22 |     | X |   |   |                       |
| Margaret of Cortona          | OFM                              | February 22 |     | X |   |   |                       |
| Florencius                   | OP                               | February 23 | X   |   |   |   |                       |
| Martha                       | Virgin, Martyr                   | February 23 | X   |   |   |   |                       |
| Matthias                     | Apostle                          | February 24 | X t |   | X | X | X                     |
| Leander                      | Archbishop of Seville, Confessor | February 27 | X   |   |   | E | E                     |
| Cyril of Alexandria          | Bishop, Confessor                | February 28 | X   |   |   |   |                       |
| Andronicus and Athanasia     | Man and Wife then Monk and Nun   | February 28 |     | X |   |   | E (filed under Oct 8) |
| Guardian Angel               |                                  | March 1     | X   |   | X | X | X                     |
| Rodesindus                   | Bishop, Confessor                | March 1     | X   |   |   |   |                       |
| Fray Antonio Estroconio      | OFM                              | March 1     |     | X |   |   |                       |
| Emeterius and Celedonius     | Martyr                           | March 3     | X   |   |   |   | E                     |
| Cunegunde                    | Empress, Virgin                  | March 3     |     | X |   |   | E                     |
| Lucius                       | Pope, Martyr                     | March 5     |     |   |   | X | X                     |
| Sister Collecta              | Nun of St. Claire                | March 6     |     | X |   |   |                       |
| Thomas Aquinas               | (Doctor)                         | March 7     | X t |   | X | X | X                     |
| Perpetua and Felicity        | Martyr                           | March 7     | X t |   | X | X | X                     |
| Equicius                     | Abbot                            | March 7     |     | X |   |   | E                     |
| Julian                       | Archbishop of Toledo, Confessor  | March 8     | X   |   | X | X | X                     |

|                        |                                       |          |     |   |   |   |   |
|------------------------|---------------------------------------|----------|-----|---|---|---|---|
| John of God            |                                       | March 8  |     | X |   |   |   |
| 40 Martyrs             | Martyr                                | March 9  | X t |   | X | X | X |
| Pacianus               | Bishop, Confessor                     | March 9  | X   |   |   |   |   |
| Gregory of Nyssa       | Bishop, Confessor                     | March 9  |     |   |   |   | E |
| Eulogius               | Presbyter, Martyr                     | March 11 | X   |   |   | E | E |
| Gregory                | Pope, Doctor of the Church, Confessor | March 12 | X t |   | X | X | X |
| Dennis                 | Carthusian, Ecstatic Doctor           | March 12 |     | X |   |   |   |
| Rudericus and Salomon  | Priest (R), Martyr                    | March 13 | X   |   |   |   |   |
| Euphrasia              | Virgin                                | March 13 | X   |   |   |   | E |
| Sabinus                | Martyr                                | March 13 |     | X |   |   |   |
| Orencius               | Confessor                             | March 15 | X   |   |   |   |   |
| Matrona                | Virgin, Martyr                        | March 15 | X   |   |   |   |   |
| Longinus               | Centurion, Martyr                     | March 15 | X   |   |   | E | E |
| Abram                  | Anchorite, Confessor                  | March 16 |     | X |   |   | E |
| Patrick                | Bishop, Confessor                     | March 17 | X   |   |   |   |   |
| Gabriel                | Archangel                             | March 18 | X   |   | X | X | X |
| Narcissus              | Bishop, Martyr                        | March 18 | X   |   |   |   | E |
| Cyril                  | Patriarch of Jerusalem, Confessor     | March 18 | X   |   |   | E | E |
| Edward                 | King of Britain                       | March 18 |     | X |   |   |   |
| Joseph                 | Husband of the mother of God          | March 19 | X t |   | X | X | X |
| Fray Ambrosio de Siena | OP                                    | March 19 |     | X |   |   |   |
| Martin                 | Bishop of Braga, Confessor            | March 20 | X   |   |   |   |   |

|                            |                                   |          |     |   |   |     |   |
|----------------------------|-----------------------------------|----------|-----|---|---|-----|---|
| Cuthbert                   | Bishop, Confessor                 | March 20 |     | X |   |     |   |
| Benedict                   | Abbot                             | March 21 | X t |   | X | X   | X |
| Serapion Sindonius         | Monk                              | March 21 |     | X |   |     |   |
| Leah                       | Roman Woman                       | March 21 |     |   |   |     | E |
| Catherine of Sweden        | Daughter of Brigit                | March 22 |     |   |   |     | E |
| Simeon                     | Innocent, Martyr                  | March 24 |     | X |   |     |   |
| Annunciation of Our Lady   | (Encarnación del Verbo Eterno)    | March 25 | X t |   | X | X   | X |
| Braulius                   | Bishop of Zaragoza, Confessor     | March 26 | X   |   |   | E   | E |
| Augusta                    | Virgin, Martyr                    | March 27 |     | X |   |     |   |
| John                       | Hermit                            | March 27 |     | X |   |     |   |
| Issac                      | Confessor                         | March 27 |     |   |   |     | E |
| Mark                       | Bishop of Aretusa, Martyr         | March 29 |     | X |   |     |   |
| Jonas and Barachisus       |                                   | March 29 |     | X |   |     |   |
| John Climacus              | Confessor                         | March 30 | X   |   |   | E   | E |
| Hugo                       | Bishop, Confessor                 | April 1  |     | X |   |     | E |
| Fray Melchor de Hiebra     | OFM                               | April 1  |     | X |   |     |   |
| Francis of Paula           | Confessor (Founder of the Minims) | April 2  | X t |   | X | X * | X |
| Mary of Egypt              | Penitent                          | April 2  | X   |   |   | E   | E |
| Alferius                   | Abbot                             | April 2  |     | X |   |     |   |
| Death and Passion of Jesus | Friday                            | April 3  | X t |   |   |     |   |
| Ladron                     | Saint ( <i>sancto</i> )           | April 3  |     | X |   |     |   |
| Isidore                    | Archbishop of Seville, Confessor  | April 4  | X   |   | X | X   | X |

|                                       |                                     |          |     |   |   |     |   |
|---------------------------------------|-------------------------------------|----------|-----|---|---|-----|---|
| Lidwina                               | Monk                                | April 4  |     | X |   |     |   |
| Resurrection                          | Sunday                              | April 5  | X t |   |   |     |   |
| Vincent Ferrer                        | OP, Confessor                       | April 5  | X   |   |   | E   | E |
| Haybert                               | Priest, Monk                        | April 7  |     | X |   |     |   |
| Casilda                               | Virgin                              | April 9  | X   |   |   |     | E |
| Leo                                   | Pope, Confessor<br>(the Great)      | April 11 | X t |   | X | X   | X |
| Antipas                               | Bishop, Martyr                      | April 11 |     | X |   |     |   |
| Elias                                 | Monk, Protector of<br>Isolated Nuns | April 11 |     | X |   |     |   |
| Isaac                                 | Monk                                | April 11 |     | X |   |     |   |
| Guthlacus                             | Anchorite                           | April 11 |     | X |   |     |   |
| Victor                                | Martyr of Braga                     | April 12 | X   |   |   |     |   |
| Hermenigild                           | Martyr                              | April 13 | X   |   | X | X * | X |
| Justinus                              | Philosopher,<br>Martyr              | April 13 | X   |   |   | E   | E |
| Pedro González Telmo                  | Confessor                           | April 13 | X   |   |   | E   | E |
| Marcus                                | Abbot                               | April 13 |     | X |   |     |   |
| Tiburcius, Valerianus, and<br>Maximus | Martyr                              | April 14 | X t |   | X | X   | X |
| Liduvina                              | Virgin                              | April 14 |     |   |   |     | E |
| Engratia and 18 of<br>Zaragoza        | Virgin, Martyr                      | April 16 | X   |   |   | E   | E |
| Fructuosus                            | Bishop of Braga,<br>Confessor       | April 16 | X   |   |   |     | E |
| Lambert                               | Martyr                              | April 16 | X   |   |   |     |   |
| Toribius                              | Bishop of Astorga,<br>Confessor     | April 16 | X   |   |   |     | E |
| Anicetus                              | Pope, Martyr                        | April 17 | X t |   | X | X   | X |

|                                 |                                   |          |     |   |   |     |   |
|---------------------------------|-----------------------------------|----------|-----|---|---|-----|---|
| Helias                          | Presbyter                         | April 17 | X   |   |   |     |   |
| Paul and Isidore                | Martyr                            | April 17 | X   |   |   |     |   |
| Prefectus                       | Presbyter, Martyr                 | April 18 | X   |   |   |     |   |
| Eleuthere and Anthia            | Bishop and his Mother             | April 18 |     | X |   |     |   |
| Vincent of Colluire             | Martyr                            | April 19 | X   |   |   |     |   |
| Weruherus                       | Martyr                            | April 19 |     | X |   |     |   |
| Elphegus                        | Archbishop of Cantruaia, Martyr   | April 19 |     | X |   |     |   |
| Anselm                          | Bishop, Confessor                 | April 21 | X   |   |   | E   | E |
| Simeon, Usthazanes, and Others  | Bishop, Eunuch, Martyr            | April 21 |     | X |   |     |   |
| Soter and Caius                 | Pope, Martyr                      | April 22 | X t |   | X | X   | X |
| Acepsimas, Joseph, and Eythalas | Bishop, Presbyter, Deacon, Martyr | April 22 |     | X |   |     |   |
| George                          | Martyr                            | April 23 | X t |   | X | X   | X |
| Fray Gil                        | OFM                               | April 23 |     | X |   |     |   |
| Robert                          | First Abbot of the House of God   | April 24 |     | X |   |     |   |
| Mark                            | Evangelist                        | April 25 | X t |   | X | X   | X |
| Cletus and Marcellinus          | Pope, Martyr                      | April 26 | X t |   | X | X   | X |
| Peter Martyr                    | Bishop of Braga                   | April 26 | X   |   |   |     |   |
| Basileus                        | Bishop, Martyr                    | April 26 |     | X |   |     |   |
| Anthimus                        | Bishop, Martyr                    | April 27 |     | X |   |     |   |
| Vidal                           | Martyr                            | April 28 | X t |   | X | X * | X |
| Prudencius                      | Bishop, Martyr                    | April 28 | X   |   |   |     |   |
| Theodora                        | Virgin, Martyr                    | April 28 | X   |   |   | E   | E |
| Peter the Inquisitor            | Martyr                            | April 29 | X t |   | X | X   | X |
| Catherine of Siena              | Virgin                            | April 29 | X   |   |   | X   | X |

|                                              |                                                                  |          |     |   |   |     |   |
|----------------------------------------------|------------------------------------------------------------------|----------|-----|---|---|-----|---|
| Robert                                       | Confessor,<br>Founder of the<br>Cistercians                      | April 29 | X   |   |   |     |   |
| Amador, Peter, Louis                         | Martyr                                                           | April 29 | X   |   |   |     |   |
| Hugo                                         | Abbot, Cluniac                                                   | April 29 |     | X |   |     |   |
| Philip                                       | Apostle                                                          | May 1    | X t |   | X | X   | X |
| James the Lesser                             | Apostle                                                          | May 1    | X t |   | X | X   | X |
| Orencius and Patientia                       | Martyr                                                           | May 1    | X   |   |   |     |   |
| Marculphus                                   | Abbot                                                            | May 1    |     | X |   |     |   |
| Zoerardus                                    | Confessor                                                        | May 1    |     | X |   |     |   |
| Walpurgis                                    | Virgin                                                           | May 1    |     |   |   |     | E |
| Athanasius                                   | Bishop, Confessor                                                | May 2    | X t |   | X | X * | X |
| Antonino of Florence                         | Bishop, Confessor                                                | May 2    | X   |   |   | E   | E |
| Invention of the Cross                       |                                                                  | May 3    | X t |   | X | X   | X |
| Alexander and Others                         | Pope, Martyr                                                     | May 3    | X t |   | X | X   | X |
| Juvenal                                      | Bishop, Confessor                                                | May 3    | X t |   |   |     |   |
| Joanne of the Cross                          | Abbess, OFM                                                      | May 3    |     | X |   |     |   |
| Alexander and Antonina                       | Martyrs (Double of<br>the Other Life of<br>Alexander and<br>Co.) | May 3    |     | X |   |     |   |
| Monica                                       | Mother of<br>Augustine                                           | May 4    | X t |   | X | X   | X |
| Carthusian Martyrs                           | Martyr                                                           | May 4    | X   |   |   |     |   |
| Sacerdotus                                   | Bishop, Confessor                                                | May 5    | X   |   |   |     |   |
| Angelo                                       | Carmelite, Martyr                                                | May 5    | X   |   |   |     |   |
| John the Evangelist before<br>the Latin Gate |                                                                  | May 6    | X t |   | X | X   | X |
| John Damascene                               | Confessor                                                        | May 6    | X   |   |   | E   | E |

|                                   |                                                     |        |     |   |   |     |   |
|-----------------------------------|-----------------------------------------------------|--------|-----|---|---|-----|---|
| Stanislaus                        | Bishop, Martyr<br>[Villegas has him<br>under May 8] | May 7  |     | X | X | X   | X |
| Apparition of Michael             |                                                     | May 8  | X t |   | X | X   | X |
| Gregory Nazianzus                 |                                                     | May 9  | X t |   | X | X   | X |
| Gregory                           | Bishop of Ostia,<br>Confessor                       | May 9  | X   |   |   |     |   |
| Gordianus and Epimachus           | Martyr                                              | May 10 | X t |   | X | X   | X |
| Glyceria and Laodicius            | Martyr                                              | May 10 |     | X |   |     |   |
| Pontus                            | Martyr                                              | May 11 | X   |   |   |     |   |
| Gangulphus                        | Martyr                                              | May 11 |     | X |   |     |   |
| Nereus, Archileus, and<br>Pancras | Martyr                                              | May 12 | X t |   | X | X * | X |
| Domingo de la Calçada             | Confessor                                           | May 12 | X   |   |   |     | E |
| Epiphanius                        | Bishop, Confessor                                   | May 12 | X   |   |   | E   | E |
| Servacius                         | Bishop, Confessor                                   | May 13 |     | X |   |     |   |
| John the Silent                   | Bishop, Confessor                                   | May 13 |     | X |   |     |   |
| Ascention                         | Thursday                                            | May 14 | X t |   |   |     |   |
| Boniface                          | Martyr                                              | May 14 | X t |   | X | X   | X |
| Fray Hernando de<br>Talavera      | First Archbishop of<br>Granada                      | May 14 |     | X |   |     |   |
| Fray Gil                          | Portuguese, OP,<br>Confessor                        | May 14 |     | X |   |     |   |
| Victor and<br>Corona/Stephania    | Martyr                                              | May 14 |     | X |   |     |   |
| Pacomius                          | Abbot, Confessor                                    | May 14 |     |   |   |     | E |
| Torcatus and the Six              | Martyr, Bishop,<br>Confessor                        | May 15 | X   |   |   |     | E |
| Dympna                            | Virgin, Martyr                                      | May 15 |     | X |   |     | E |
| Ganada de Oran                    |                                                     | May 18 | X   |   |   |     |   |

|                                                |                                            |        |     |   |   |   |   |
|------------------------------------------------|--------------------------------------------|--------|-----|---|---|---|---|
| Potentia                                       | Virgin                                     | May 19 | X t |   | X | X | X |
| Peter Celestine                                | Founder of the<br>Celestines,<br>Confessor | May 19 |     | X |   |   | E |
| Yvon                                           | Advocate for the<br>Poor                   | May 19 |     |   |   |   | E |
| Dunstan                                        | Archbishop of<br>Canterbury,<br>Confessor  | May 19 |     |   |   |   | E |
| Bernardino                                     | Confessor                                  | May 20 | X   |   |   | E | E |
| Austregisilus                                  | Bishop, Confessor                          | May 20 |     | X |   |   |   |
| Mancius                                        | Disciple of Christ,<br>Martyr              | May 21 | X   |   |   |   |   |
| Secundinus                                     | Martyr                                     | May 21 | X   |   |   |   |   |
| Hospicius                                      | Recluse                                    | May 21 |     | X |   |   |   |
| Quiteria                                       | Virgin, Martyr                             | May 22 | X   |   |   |   |   |
| Epitacius and Basileus                         | Martyr                                     | May 23 | X   |   |   |   |   |
| Pentecost and the Coming<br>of the Holy Spirit | Sunday                                     | May 24 | X t |   |   |   |   |
| Urban                                          | Pope, Martyr                               | May 25 | X t |   | X | X | X |
| Cenobius                                       | Archbishop of<br>Florence                  | May 25 |     |   |   |   | E |
| Eleuterius                                     | Pope, Martyr                               | May 26 | X t |   | X | X | X |
| Augustine                                      | Bishop of England,<br>Confessor            | May 26 |     | X |   |   |   |
| John                                           | Pope, Martyr                               | May 27 | X t |   | X | X | X |
| Bede                                           | OSB                                        | May 27 |     | X |   |   | E |
| Justus                                         | Bishop, Confessor                          | May 28 | X   |   |   |   |   |
| Jermaine                                       | Bishop of Paris                            | May 28 |     |   |   |   | E |
| Felix                                          | Pope, Martyr                               | May 30 | X t |   | X | X | X |



|                                                         |                                                        |         |     |   |   |     |   |
|---------------------------------------------------------|--------------------------------------------------------|---------|-----|---|---|-----|---|
| Feast of the Blessed Trinity                            | Sunday                                                 | May 31  | X t |   |   |     |   |
| Petronilla                                              | Virgin (Daughter of St. Peter)                         | May 31  | X t |   | X | X   | X |
| Joan                                                    | Unmarried French Woman ( <i>donzella Francesa</i> )    | May 31  |     | X |   |     |   |
| Enecon                                                  | Abbot                                                  | June 1  | X   |   |   |     |   |
| Proculus                                                | Martyr                                                 | June 1  |     | X |   |     |   |
| Marcellinus and Others                                  | Martyr                                                 | June 2  | X t |   | X | X   | X |
| Juan de Ortega                                          | Confessor                                              | June 2  | X   |   |   |     | X |
| Isaac                                                   | Monk, Martyr                                           | June 3  | X   |   |   |     |   |
| Corpus Christi                                          | Thursday                                               | June 4  | X t |   |   |     |   |
| Sancho                                                  | Martyr                                                 | June 5  | X   |   |   |     |   |
| Boniface                                                | Archbishop, Martyr, Apostle of Germany                 | June 5  |     |   |   |     | E |
| Norbert                                                 | Archbishop of Magdeburg, Founder of the Praemonstrians | June 6  |     | X |   |     | E |
| Pedro Ubalabomso, Wistremundus, Habencius, and Jeremias | Martyr                                                 | June 8  | X   |   |   |     |   |
| Primus and Felicianus                                   | Martyr                                                 | June 9  | X t |   | X | X   | X |
| Margaret                                                | Queen of Scotland                                      | June 10 |     | X |   |     |   |
| Barnabas                                                | Apostle                                                | June 11 | X t |   | X | X   | X |
| Honophrius                                              | Confessor                                              | June 11 | X   |   |   | E   | E |
| Basilide and Others                                     | Martyr                                                 | June 12 | X t |   | X | X * | X |
| Anthony of Padua                                        | Confessor (OFM)                                        | June 13 | X   |   | X | X   | X |
| Frandida                                                | Presbyter, Martyr                                      | June 13 | X   |   |   |     |   |

|                                        |                                   |         |     |   |   |     |   |
|----------------------------------------|-----------------------------------|---------|-----|---|---|-----|---|
| Basil                                  | Bishop, Confessor<br>(the Great)  | June 14 | X t |   | X | X   | X |
| Anastasius, Felix, and<br>Dignagen     | Presbyter, Monk                   | June 14 | X   |   |   |     |   |
| Vitus and Others                       | Martyr                            | June 15 | X   |   | X | X * | X |
| Febronia                               | Nun, Virgin,<br>Martyr            | June 15 |     | X |   |     |   |
| Dulas                                  | Martyr                            | June 15 |     | X |   |     |   |
| Quiricus and Julita                    | Martyr                            | June 16 |     | X |   |     |   |
| Lutgarde                               | Nun                               | June 16 |     | X |   |     | E |
| Manuel, Sabel, and<br>Ishmael          | Martyr                            | June 17 |     | X |   |     |   |
| Marcus and Marcellianus                | Martyr                            | June 18 | X t |   | X | X   | X |
| Cyriacus and Paula                     | Martyr                            | June 18 | X   |   |   |     |   |
| Osanna de Mantua                       | OP                                | June 18 |     | X |   |     |   |
| Elizabeth of Schönau and<br>Melchiades | Nun                               | June 18 |     | X |   |     |   |
| Gervase and Protase                    | Martyr                            | June 19 | X t |   | X | X   | X |
| Romuald                                | Founder of the<br>Camaldulensians | June 19 |     | X |   |     |   |
| Sylvester                              | Pope, Martyr                      | June 20 | X t |   | X | X   | X |
| Florentina                             | Virgin                            | June 20 | X   |   |   |     |   |
| Luigi Gonzaga                          | SJ                                | June 20 |     |   |   |     | E |
| Martín de Azpilcueta                   | Doctor from<br>Navarre            | June 21 |     | X |   |     |   |
| Paulinus                               | Bishop, Confessor                 | June 22 | X t |   | X | X   | X |
| Acacius and Others                     | Martyr                            | June 22 | X   |   |   |     |   |
| John Fisher                            | Bishop of<br>Rochester            | June 22 |     | X |   |     |   |
| Birth of John the Baptist              |                                   | June 24 | X t |   | X | X   | X |

|                           |                                           |         |     |   |   |     |   |
|---------------------------|-------------------------------------------|---------|-----|---|---|-----|---|
| Lupicinus                 | Recluse, Confessor                        | June 24 |     | X |   |     |   |
| John                      | Hermit                                    | June 24 |     | X |   |     |   |
| Eurosia                   | Virgin, Martyr                            | June 25 | X   |   |   |     |   |
| Eligius                   | Bishop, Confessor                         | June 25 | X   |   |   |     |   |
| Prosper of Aquitaine      | Bishop, Confessor                         | June 25 | X   |   |   | E   | E |
| Cucufate and Felix        | Martyr                                    | June 25 |     |   |   |     | E |
| John and Paul             | Martyr                                    | June 26 | X t |   | X | X   | X |
| Pelagius                  | Martyr                                    | June 26 | X   |   |   |     | E |
| Vigilius                  | Bishop, Martyr                            | June 26 |     | X |   |     |   |
| Zoilus                    | Martyr                                    | June 27 | X   |   |   |     |   |
| Samson                    | Host                                      | June 27 |     | X |   |     |   |
| Leo                       | Pope, Confessor<br>(segundo deste nombre) | June 28 | X t |   | X | X * | X |
| Juliana                   | Virgin, Martyr                            | June 28 | X   |   |   |     |   |
| Argimirus                 | Monk, Martyr                              | June 28 | X   |   |   |     |   |
| Ireneus                   | Bishop, Martyr                            | June 28 | X   |   |   | E   | E |
| Theobaldus                | Bishop, Confessor                         | June 28 |     | X |   |     |   |
| Peter                     | Apostle                                   | June 29 | X t |   | X | X   | X |
| Paul                      | Apostle                                   | June 30 | X t |   | X | X   | X |
| Rumold                    | Martyr                                    | July 1  |     | X |   |     |   |
| Visitation of Our Lady    |                                           | July 2  | X t |   | X | X   | X |
| Processus and Martinianus | Martyr                                    | July 2  | X t |   | X | X   | X |
| Sister Mary the Poor      |                                           | July 3  |     | X |   |     |   |
| Laurianus                 | Archbishop of Seville, Martyr             | July 4  | X   |   |   |     | E |
| Udalrico                  | Bishop of Augusta, Confessor              | July 4  |     |   |   |     | E |

|                                      |                                                  |         |     |   |   |     |   |
|--------------------------------------|--------------------------------------------------|---------|-----|---|---|-----|---|
| Goar                                 | Presbyter,<br>Confessor                          | July 6  |     | X |   |     | E |
| Godoleva                             | Martyr                                           | July 6  |     | X |   |     | E |
| Odon                                 | Bishop, Confessor                                | July 7  | X   |   |   |     |   |
| Thomas More                          | Chancellor of<br>England                         | July 7  |     | X |   |     |   |
| Jilianus, Colomanus, and<br>Totnanus | Bishop, Presbyter,<br>Deacon, Martyr             | July 8  |     | X |   |     |   |
| Procopius                            | Martyr                                           | July 8  |     | X |   |     | E |
| 7 Brothers                           | Martyr                                           | July 10 | X t |   | X | X   | X |
| Rufina and Secunda                   | Virgin, Martyr                                   | July 10 | X t |   | X | X   | X |
| Pius                                 | Pope, Martyr                                     | July 11 | X t |   | X | X   | X |
| Abundius                             | Presbyter, Martyr                                | July 11 | X   |   |   |     |   |
| Nabor and Felix                      | Martyr                                           | July 12 | X t |   | X | X   | X |
| John Gualbert                        | Abbot, Founder of<br>Valumbrosians,<br>Confessor | July 12 |     | X |   | X   | X |
| Anacletus                            | Pope, Martyr                                     | July 13 | X   |   | X | X * | X |
| Elizabeth of Portugal                | Queen of Portugal                                | July 13 | X   |   |   | E   | E |
| Bonaventure                          | Cardinal                                         | July 14 | X t |   | X | X   | X |
| Balthasar Gérard                     | Soldier                                          | July 14 |     | X |   |     |   |
| Venilde                              | Midwife, Martyr                                  | July 15 | X   |   |   |     |   |
| Jacob Nisibita                       | Bishop, Confessor                                | July 15 |     | X |   |     | E |
| Triumph of the Cross                 |                                                  | July 16 | X   |   | X | X   | X |
| Sisenandus                           | Deacon, Martyr                                   | July 16 | X   |   |   |     |   |
| Alexis                               | Confessor                                        | July 17 | X t |   | X | X   | X |
| Justa and Rufina                     | Virgin, Martyr                                   | July 17 | X   |   |   |     |   |
| Maria de Ajofrín                     | Nun of San Pablo<br>de Toledo                    | July 17 |     | X |   |     |   |

|                                        |                                |         |     |   |   |     |   |
|----------------------------------------|--------------------------------|---------|-----|---|---|-----|---|
| Symphorosa and 7 Sons                  | Martyr                         | July 18 | X t |   | X | X   | X |
| Marina                                 | Virgin, Martyr                 | July 18 | X   |   |   |     |   |
| Frederick                              | Bishop, Martyr                 | July 18 |     | X |   |     |   |
| Aurea                                  | Virgin, Martyr                 | July 19 | X   |   |   |     |   |
| Arsenius                               | Hermit                         | July 19 |     | X |   |     | E |
| Macrina                                | Virgin                         | July 19 |     | X |   |     | E |
| Margaret / Marina                      | Virgin, Martyr                 | July 20 | X t |   | X | X   | X |
| Paul and Theodemirus                   | Deacon, Monk,<br>Martyr        | July 20 | X   |   |   |     |   |
| Pragede                                | Virgin                         | July 21 | X t |   | X | X   | X |
| Mary Magdalene                         |                                | July 22 | X t |   | X | X   | X |
| Plato                                  | Martyr                         | July 22 |     | X |   |     |   |
| Apollinaire                            | Bishop, Martyr                 | July 23 | X   |   | X | X * | X |
| Brigit                                 | Widow                          | July 23 | X   |   |   | E   | E |
| Christina                              | Virgin, Martyr                 | July 24 | X t |   | X | X   | X |
| Victor, Stercacijs, and<br>Antinogenes | Martyr                         | July 24 | X   |   |   |     |   |
| James the Greater                      | Apostle                        | July 25 | X t |   | X | X   | X |
| Christopher                            | Martyr                         | July 25 | X   |   | X | X   | X |
| Anne                                   | Mother of the<br>Mother of God | July 26 | X t |   | X | X   | X |
| Maurice and 70 Soldiers                | Martyr                         | July 26 |     | X |   |     |   |
| Pantaleon                              | Martyr                         | July 27 | X t |   | X | X   | X |
| George                                 | Deacon, Martyr                 | July 27 | X   |   |   |     |   |
| Aurelius, Felix, Natalia,<br>and Lilia |                                | July 27 | X   |   |   |     |   |
| 7 Sleepers                             |                                | July 27 | X   |   |   |     | E |
| Lupus                                  | Bishop, Confessor              | July 27 |     |   |   |     | E |
| Nazarius and Celsus                    | Martyr                         | July 28 | X t |   | X | X   | X |

|                                                      |                              |          |     |   |                         |                         |   |
|------------------------------------------------------|------------------------------|----------|-----|---|-------------------------|-------------------------|---|
| Victor                                               | Pope, Martyr                 | July 28  | X t |   | X                       | X                       | X |
| Innocent                                             | Pope, Confessor              | July 28  | X t |   | X                       | X                       | X |
| Martha                                               | Virgin, Guest of Christ      | July 29  | X t |   | X                       | X                       | X |
| Simplicius, Faustus, and Beatrice                    | Martyr                       | July 29  | X t |   | X                       | X                       | X |
| Felix                                                | Martyr                       | July 29  | X t |   | X                       | X                       | X |
| Abdon and Sennen                                     | Martyr                       | July 30  | X   |   | X                       | X                       | X |
| Jermaine (of Augerre)                                | Bishop, Confessor            | July 30  |     | X |                         |                         | E |
| Ignatius Loyola                                      | Founder of the SJ            | July 31  | X   |   | Addendum<br>(after Dec) | Addendum<br>(after Dec) | E |
| Peter in Chains                                      |                              | August 1 | X t |   | X                       | X                       | X |
| Maccabees                                            | Martyr                       | August 1 | X t |   | X                       | X                       | X |
| Felix and Cucuphates                                 | Martyr                       | August 1 | X   |   |                         |                         |   |
| Sophia and her 3 Daughters: Faith, Hope, and Charity |                              | August 1 |     | X |                         |                         |   |
| Ethelbold                                            | Bishop of Winchester         | August 1 |     |   |                         |                         | E |
| Stephen                                              | Pope, Martyr                 | August 2 | X t |   | X                       | X                       | X |
| Invention of Stephen Protomartyr                     |                              | August 3 | X t |   | X                       | X                       | X |
| Gamaliel, Nicodemus, and Abibon                      |                              | August 3 |     |   |                         | X                       | X |
| Dominic                                              | Founder of the OP, Confessor | August 4 | X t |   | X                       | X                       | X |
| Peter                                                | Bishop of Osma, Confessor    | August 4 | X   |   |                         |                         |   |
| Fray Chernbivus of Spoleto                           |                              | August 4 |     | X |                         |                         |   |

|                                   |                          |           |     |   |   |   |   |
|-----------------------------------|--------------------------|-----------|-----|---|---|---|---|
| Feast of Our Lady of Snows        |                          | August 5  | X t |   | X | X | X |
| Afra                              | Prostitute turned Martyr | August 5  |     | X |   |   |   |
| Trasfiguration                    |                          | August 6  | X t |   | X | X | X |
| Sixtus, Felicissimus, and Agaptus | Pope, Martyr             | August 6  | X t |   | X | X | X |
| Justus and Pastor                 | Martyr                   | August 6  | X   |   | X | X | X |
| Donatus                           | Bishop and Martyr        | August 7  | X t |   | X | X | X |
| Albert                            | Carmelite, Confessor     | August 7  | X   |   |   |   | E |
| Cyriacus, Largus, and Smaragdus   | Martyr                   | August 8  | X t |   | X | X | X |
| Roman                             | Soldier, Martyr          | August 9  | X t |   | X | X | X |
| Lawrence                          | Martyr                   | August 10 | X t |   | X | X | X |
| Tiburcius                         | Martyr                   | August 11 | X t |   | X | X | X |
| Susanna                           | Virgin, Martyr           | August 11 | X t |   | X | X | X |
| Clara                             | Virgin                   | August 12 | X   |   | X | X | X |
| Hippolytus                        | Martyr                   | August 13 | X t |   | X | X | X |
| Cassianus                         | Martyr                   | August 13 | X t |   | X | X | X |
| Centolla and Helena               | Martyr                   | August 13 | X   |   |   |   |   |
| Simplicianus                      | Archbishop of Milan      | August 13 |     | X |   |   | E |
| Radegund                          | Queen                    | August 13 |     | X |   |   |   |
| Eusebius                          | Presbyter, Confessor     | August 14 | X t |   | X | X | X |
| Nuño Álvarez                      | Precentor of Cuenca      | August 14 |     | X |   |   |   |
| Stanislaus Kostka                 | SJ                       | August 14 |     |   |   |   | E |
| Assumption of Our Lady            |                          | August 15 | X t |   | X | X | X |

|                                |                                                          |           |     |   |   |     |   |
|--------------------------------|----------------------------------------------------------|-----------|-----|---|---|-----|---|
| Roch                           | Confessor                                                | August 16 | X   |   |   | E   | E |
| Hyacinth                       | OP, Confessor                                            | August 16 |     |   |   |     | E |
| Clara di Montefalco            | [OFM]                                                    | August 17 |     | X |   | E   | E |
| Paul and Juliana               | Martyr                                                   | August 17 |     | X |   |     |   |
| Agapitus                       | Martyr                                                   | August 18 | X t |   | X | X * | X |
| Helena                         | Queen                                                    | August 18 | X   |   |   | E   | E |
| Louis                          | Bishop, Confessor,<br>[OFM]                              | August 19 | X t |   |   |     | E |
| Bernard                        | Abbot                                                    | August 20 | X t |   | X | X   | X |
| Christopher and<br>Lewigildus  | Monk, Martyr                                             | August 20 | X   |   |   |     |   |
| Bernard                        | Martyr, Son of the<br>King of Carlet,<br>Cistercian Monk | August 20 | X   |   |   |     |   |
| Stephen                        | King of Hungary,<br>Confessor                            | August 20 |     | X |   |     | E |
| Timothy and Others             | Martyr                                                   | August 22 | X t |   | X | X   | X |
| Hippolytus and<br>Sinthorianus | Bishop, Martyr                                           | August 22 |     |   |   | X   | X |
| Sidonius Apolinar              | Bishop                                                   | August 23 |     |   |   |     | E |
| Bartolomew                     | Apostle                                                  | August 24 | X t |   | X | X   | X |
| Emeric                         | Prince of Hungary,<br>Confessor                          | August 24 |     |   |   |     | E |
| Louis of France                | King, Confessor                                          | August 25 | X t |   | X | X * | X |
| Maginus                        | Martyr                                                   | August 25 | X   |   |   |     |   |
| Gines                          | Writer, Martyr                                           | August 25 | X   |   |   | E   | E |
| Gines                          | Representative,<br>Martyr                                | August 25 | X   |   |   | E   | E |
| Eusebius and Others            | Martyr                                                   | August 25 |     | X |   |     |   |
| Fray Martín Ruíz               |                                                          | August 25 |     | X |   |     |   |



|                                          |                                                          |             |     |   |   |     |                    |
|------------------------------------------|----------------------------------------------------------|-------------|-----|---|---|-----|--------------------|
| Hunegund                                 | Nun                                                      | August 25   |     | X |   |     |                    |
| Zephonius                                | Pope, Martyr                                             | August 26   | X t |   | X | X * | X                  |
| Geruncius                                | Bishop, Martyr                                           | August 26   | X   |   |   |     |                    |
| George                                   | Deacon, Monk                                             | August 27   | X   |   |   |     |                    |
| Aurelius, Felix, Natalia,<br>and Lisiosa | Martyr                                                   | August 27   | X   |   |   |     |                    |
| Licerius                                 | Bishop, Confessor                                        | August 27   | X   |   |   |     |                    |
| Cesarius                                 | Bishop of Arles                                          | August 27   |     |   |   |     | E                  |
| Augustine                                | Bishop, Doctor of<br>the Church,<br>Confessor            | August 28   | X t |   | X | X   | X                  |
| Hermes                                   | Martyr                                                   | August 28   | X t |   | X | X   | X                  |
| Moses                                    | Anchorite,<br>Confessor (cp.<br>with one in<br>February) | August 28   |     |   |   |     | E                  |
| Beheading of John the<br>Baptist         |                                                          | August 29   | X t |   | X | X   | X                  |
| Sabina                                   | Martyr                                                   | August 29   | X t |   | X | X   | X                  |
| Felix and Adauctus                       | Martyr                                                   | August 30   | X t |   | X | X   | X                  |
| Gil                                      | Abbot                                                    | September 1 | X t |   | X | X   | X                  |
| 12 Brothers                              | Martyr                                                   | September 1 | X t |   | X | X   |                    |
| Fray Bernabé de Iterana                  | OFM                                                      | September 1 |     | X |   |     |                    |
| Antolin                                  | Martyr                                                   | September 2 | X   |   |   |     |                    |
| Sandalius                                | Martyr                                                   | September 3 | X   |   |   |     |                    |
| Victorinus                               | Bishop, Martyr                                           | September 5 |     | X |   |     |                    |
| Humbert                                  | Confessor                                                | September 6 |     | X |   |     | E (under Dec<br>6) |
| Birth of Our Lady                        |                                                          | September 8 | X t |   | X | X   | X                  |

|                                        |                                                 |              |     |   |   |     |   |
|----------------------------------------|-------------------------------------------------|--------------|-----|---|---|-----|---|
| Adrian                                 | Martyr                                          | September 8  | X t |   | X | X   | X |
| Gorgonius                              | Martyr                                          | September 9  | X t |   | X | X   | X |
| Nicholas of Tolentino                  | Confessor                                       | September 10 | X t |   | X | X   | X |
| Menodora, Metrodora,<br>and Nymphodora | Virgin, Martyr                                  | September 10 |     | X |   |     |   |
| Prothus and Hyacinth                   | Martyr                                          | September 11 | X t |   | X | X * | X |
| Vicente de León                        | Martyr                                          | September 11 | X   |   |   |     |   |
| Theodora of Alexandria                 | Penitent                                        | September 11 | X   |   |   | E   | E |
| Fray Francisco Titelman                | OFM, Capuchin                                   | September 12 |     | X |   |     |   |
| Cornelius                              | Centurion,<br>Confessor                         | September 13 | X t |   |   |     |   |
| Eulogius                               | Monk, Confessor                                 | September 13 |     | X |   |     |   |
| Maurilius                              | Bishop of Augiers,<br>Confessor                 | September 13 |     |   |   |     | E |
| Exaltation of the Cross                |                                                 | September 14 | X t |   | X | X   | X |
| Pedro Arbues de Epila                  | Inquisitor                                      | September 14 |     | X |   |     |   |
| Nicomedes                              | Presbyter, Martyr                               | September 15 | X t |   | X | X   | X |
| Emilia and Jeremias                    | Martyr                                          | September 15 | X   |   |   |     |   |
| Aycard                                 | Abbot of Jumièges<br>Abbey                      | September 15 |     |   |   |     | E |
| Cornelius                              | Pope, Martyr                                    | September 16 | X t |   | X | X   | X |
| Cyprian                                | Bishop, Martyr                                  | September 16 | X t |   | X | X   | X |
| Eufemia and Others                     | Virgin, Martyr                                  | September 16 | X t |   | X | X   | X |
| Eufemia                                | Martyr                                          | September 16 | X   |   |   |     |   |
| Lucy and Geminianus                    | Martyr                                          | September 16 |     |   | X | X   | X |
| Ludmilla                               | Duchess, Martyr                                 | September 16 |     | X |   |     |   |
| Edith                                  | Virgin, Daughter of<br>King Edgar of<br>England | September 16 |     |   |   |     | E |

|                                 |                                    |              |     |   |   |   |                  |
|---------------------------------|------------------------------------|--------------|-----|---|---|---|------------------|
| Columba                         | Virgin, Martyr                     | September 17 | X   |   |   |   |                  |
| Lambert                         | Bishop, Martyr                     | September 17 |     | X |   |   | E                |
| Faustus, Januarius, and Martial | Martyr                             | September 18 | X   |   |   |   | E (under Oct 13) |
| Januarius and Others            | Bishop, Martyr                     | September 19 | X t |   | X | X | X                |
| Pomposa                         | Virgin, Martyr                     | September 19 | X   |   |   |   |                  |
| Eustachius and Others           | Martyr                             | September 20 | X t |   | X | X | X                |
| Matthew                         | Apostle, Evangelist                | September 21 | X t |   | X | X | X                |
| Fray Gonzalo Sánchez            | OFM                                | September 21 |     | X |   |   |                  |
| Barbara de Santiago             | Married woman<br>( <i>casada</i> ) | September 21 |     | X |   |   |                  |
| Maurice and Others              | Martyr                             | September 22 | X t |   | X | X | X                |
| Linus                           | Pope, Martyr                       | September 23 | X t |   | X | X | X                |
| Thecla                          | Virgin                             | September 23 | X t |   | X | X | X                |
| Firmius                         | Bishop, Martyr                     | September 25 | X   |   |   |   |                  |
| Cyprian and Justina             | Martyr                             | September 26 | X t |   | X | X | X                |
| Gregory, Ripsime, and Gayana    | Bishop of Armenia,<br>Nun, Martyr  | September 26 |     | X |   |   |                  |
| Cosmus and Damian               | Physicians, Martyr                 | September 27 | X t |   | X | X | X                |
| Wenceslaus                      | Duke of Bohemia,<br>Martyr         | September 28 |     | X |   |   | E                |
| Dedication of St. Michael       |                                    | September 29 | X t |   | X | X | X                |
| Ursus, Victor, and Others       | Martyr                             | September 29 |     | X |   |   |                  |
| Jerome                          | Doctor of the<br>Church, Confessor | September 30 | X t |   | X | X | X                |
| Gerasimus                       | Abbot                              | September 30 |     | X |   |   |                  |
| Francis Borgia                  | SJ                                 | September 30 |     |   |   |   | E                |
| Remigius                        | Bishop, Confessor                  | October 1    | X t |   | X | X | X                |

|                                     |                                       |            |     |   |   |   |   |
|-------------------------------------|---------------------------------------|------------|-----|---|---|---|---|
| Verissimus, Maxima, and Julia       | Martyr                                | October 1  | X   |   |   |   |   |
| Annanias                            | Disciple of Christ, Martyr            | October 1  | X   |   |   |   |   |
| Babonius                            | Confessor                             | October 1  |     | X |   |   |   |
| Froylanus                           | Bishop, Confessor                     | October 3  | X   |   |   |   |   |
| Gerard                              | Abbot, Confessor                      | October 3  |     |   |   |   | E |
| Francis of Assisi                   | Founder of OFM, Confessor             | October 4  | X t |   | X | X | X |
| Hierotheous                         | The Divine                            | October 4  | X   |   |   |   |   |
| Petronius                           | Bishop of Bologna                     | October 4  |     |   |   |   | E |
| Attilanus                           | Bishop, Confessor                     | October 5  | X   |   |   |   |   |
| Placidus                            | Martyr, Disciple of St. Benedict      | October 5  |     | X | X | X | X |
| Caritine                            | Virgin, Martyr                        | October 5  |     | X |   |   |   |
| Faith                               | Virgin, Martyr                        | October 6  | X   |   |   |   |   |
| Bruno                               | Founder of the Carthusians, Confessor | October 6  | X   |   |   | E | E |
| Marcus                              | Pope, Confessor                       | October 7  | X t |   | X | X | X |
| Sergius and Others                  | Martyr                                | October 7  | X t |   | X | X | X |
| Marcellus and Apileius              | Martyr                                | October 7  |     |   |   | X | X |
| Battle of Lepanto                   | Victory against the Turks             | October 7  | X   |   |   |   |   |
| Ositha                              | Virgin, Martyr                        | October 7  |     | X |   |   | E |
| Peter Martyr of Seville             | Martyr                                | October 8  | X   |   |   |   |   |
| Pelagia                             | Penitents                             | October 8  | X   |   |   | E | E |
| Dionysius the Aeropagite and Others | Bishop, Martyr                        | October 9  | X t |   | X | X | X |
| Fray Luis Bertrán                   | OP                                    | October 10 |     | X |   |   |   |

|                                  |                          |            |     |   |   |   |   |
|----------------------------------|--------------------------|------------|-----|---|---|---|---|
| Gumarus                          | Married, Confessor       | October 11 |     |   |   |   | E |
| Diego Alemán                     | OP                       | October 11 |     |   |   |   | E |
| Taracus, Probus, and Andronicus  | Martyr                   | October 12 |     | X |   |   |   |
| Faustinus, Marcus, and Adria     | Martyr                   | October 13 | X   |   |   |   |   |
| Calixtus                         | Pope, Martyr             | October 14 | X t |   | X | X | X |
| Domingo el Lorigado              | OSB, Confessor           | October 14 |     | X |   |   |   |
| Burcard                          | Bishop of Würzburg       | October 14 |     |   |   |   | E |
| Hedwige                          | Duchess of Poland, Widow | October 15 |     | X |   |   | E |
| Luke                             | Evangelist               | October 18 | X t |   | X | X | X |
| Malchus                          | Monk, Captive            | October 18 | X   |   |   | E | E |
| Thayde                           | Penitents                | October 19 |     | X |   |   |   |
| Irene                            | Virgin, Martyr           | October 20 | X   |   |   |   | E |
| Hilarion                         | Abbot                    | October 21 | X t |   | X | X | X |
| Ursula and the 11000 Virgins     | Virgin                   | October 21 | X t |   | X | X | X |
| Nunilus and Alodia               | Virgin, Martyr           | October 22 | X   |   |   |   |   |
| Servandus and Germanus           | Martyr                   | October 23 | X   |   |   |   | E |
| Fray Juan de Capistrano          | OFM                      | October 23 |     | X |   |   |   |
| Chrisanthus and Daria            | Martyr                   | October 25 | X t |   | X | X | X |
| Fruto de Segocia                 | Confessor                | October 25 | X   |   |   |   |   |
| Crispin and Crispinianus         | Martyr                   | October 25 | X   |   |   |   |   |
| Evaristus                        | Pope, Martyr             | October 26 | X t |   | X | X | X |
| Vicencius, Sabina, and Christeta | Martyr                   | October 27 | X   |   |   | E | E |
| Simon and Jude                   | Apostle                  | October 28 | X t |   | X | X | X |

|                                    |                                  |            |     |   |   |   |   |
|------------------------------------|----------------------------------|------------|-----|---|---|---|---|
| Anasthasia                         | Nun, Virgin, Martyr              | October 28 |     | X |   |   |   |
| Quiriacus                          | Hermit                           | October 29 |     | X |   |   |   |
| Marcellus                          | Centurion, Martyr                | October 30 | X   |   |   |   | E |
| Claudius, Lupercius, and Victorius | Martyr                           | October 30 | X   |   |   |   |   |
| Victory of Benamarín               |                                  | October 30 | X   |   |   |   |   |
| Zenobius and Zenobia               | Bishop and his Sister, Martyr    | October 30 |     | X |   |   |   |
| Quentin                            | Martyr                           | October 31 |     | X |   |   |   |
| All Saints                         |                                  | November 1 | X t |   | X | X | X |
| All Souls                          |                                  | November 2 | X t |   | X | X | X |
| Malachi                            | Archbishop of Ireland, Confessor | November 2 |     | X |   |   | E |
| Many Martyrs of Zaragoza           | Martyr                           | November 3 | X   |   |   |   |   |
| Hermengaudius                      | Bishop, Confessor                | November 3 | X   |   |   |   |   |
| Winifred                           | Virgin, Martyr                   | November 3 |     | X |   |   |   |
| Vidal and Agricola                 | Martyr                           | November 4 | X t |   | X | X | X |
| Carlo Borromeo                     | Cardinal, Archbishop of Milan    | November 4 |     | X |   |   |   |
| Galacion and Epistemes             | Martyrs                          | November 5 |     | X |   |   |   |
| Severus and Others                 | Bishop, Martyr                   | November 6 | X   |   |   |   |   |
| Englebert                          | Bishop, Martyr                   | November 7 |     | X |   |   |   |
| Jerome and Others                  | Martyrs                          | November 7 |     | X |   |   |   |
| Leonard                            | Confessor                        | November 8 | X   |   |   |   | E |
| 4 Crowned Ones                     |                                  | November 8 | X t |   | X | X | X |
| Fray Francisco Jiménez             | Cardinal, Archbishop of Toledo   | November 8 |     | X |   |   |   |

|                                              |                                               |             |     |   |   |   |   |
|----------------------------------------------|-----------------------------------------------|-------------|-----|---|---|---|---|
| Matrona                                      | Nun                                           | November 8  |     | X |   |   |   |
| 5 Martyrs                                    | Martyr                                        | November 9  | X   |   | X | X | X |
| Dedication of the Church of the Saviour      |                                               | November 9  | X t |   | X | X | X |
| Theodorus                                    | Soldier, Martyr                               | November 9  | X t |   | X | X | X |
| Triphon, Rescapius, and Nympha               | Martyr                                        | November 10 | X t |   | X | X | X |
| Theocrista of Lesbos                         | Solitary ( <i>solitaria</i> )                 | November 10 |     | X |   |   |   |
| Martin                                       | Bishop, Confessor                             | November 11 | X t |   | X | X | X |
| Menas                                        | Soldier, Martyr                               | November 11 | X t |   | X | X | X |
| Martin                                       | Pope, Martyr                                  | November 12 | X t |   | X | X | X |
| Emilianus                                    | Abbot                                         | November 12 | X   |   |   |   |   |
| Fray Diego de Alcalá                         | OFM                                           | November 12 |     | X | X | X | X |
| Millan de la Cogulla                         | Confessor                                     | November 12 |     |   |   |   | E |
| Brice                                        | Bishop, Confessor                             | November 13 | X   |   |   |   | E |
| Archadius, Probus, Paschasius, and Eutychius | Martyr                                        | November 13 | X   |   |   |   |   |
| Maxellende                                   | Virgin, Martyr                                | November 13 |     | X |   |   | E |
| Homobonus                                    | Married Merchant                              | November 13 |     |   |   |   | E |
| Albert the Great                             | Bishop, OP                                    | November 14 |     | X |   |   |   |
| Eugenius                                     | Bishop, Martyr                                | November 15 | X   |   | X | X | X |
| Samona, Guria, and Abildus                   | Martyr                                        | November 15 |     |   |   |   | E |
| Leopold                                      | Marquis of Austria                            | November 15 |     |   |   |   | E |
| Edmund                                       | Bishop, Confessor                             | November 16 |     | X |   |   | E |
| Gregory Thaumaturge                          | Bishop, Confessor                             | November 17 | X t |   | X | X | X |
| Hugo                                         | Bishop, Confessor, Founder of the Carthusians | November 17 |     |   |   | E | E |

|                                      |                                |             |     |   |   |   |   |
|--------------------------------------|--------------------------------|-------------|-----|---|---|---|---|
| Aciselus and Victoria                | Martyr                         | November 17 | X   |   |   | E | E |
| Gregory of Tours                     | Confessor                      | November 17 |     | X |   |   | E |
| Dedication of St. Peter and St. Paul |                                | November 18 | X t |   | X | X | X |
| Roman Carmelite Monk                 | Martyr                         | November 18 | X   |   |   |   |   |
| Pontianus                            | Pope, Martyr                   | November 19 | X t |   | X | X | X |
| Elizabeth of Hungary                 |                                | November 19 | X   |   |   | E | E |
| Presentation of Our Lady             |                                | November 21 | X   |   | X | X | X |
| Honorius, Eutycius, and Stephen      | Martyr                         | November 21 | X   |   |   |   |   |
| Columbanus                           | Abbot                          | November 21 |     | X |   |   | E |
| Cecilia                              | Virgin, Martyr                 | November 22 | X t |   | X | X | X |
| Clement                              | Pope, Martyr                   | November 23 | X t |   | X | X | X |
| Felicity                             | Martyr                         | November 23 | X t |   | X | X | X |
| Lucrecia                             | Virgin, Martyr                 | November 23 | X   |   |   |   |   |
| Gregory                              | Bishop of Agrigento, Confessor | November 23 |     | X |   |   |   |
| Chysogonus                           | Martyr                         | November 24 | X t |   | X | X | X |
| Floria and Maria                     | Martyr                         | November 24 | X   |   |   |   |   |
| Catherine of Alexandria              | Virgin, Martyr                 | November 25 | X t |   | X | X | X |
| Mercurius                            | Martyr                         | November 25 |     | X |   |   |   |
| Peter of Alexandria                  | Bishop, Martyr                 | November 26 | X t |   | X | X | X |
| Alipius Cionita                      | Confessor                      | November 26 |     | X |   |   |   |
| Facundus and Primitivus              | Martyr                         | November 27 | X   |   |   |   | E |
| Barlaam and Josaphat                 | Confessor                      | November 27 | X   |   |   | E | E |
| Simeon Metaphrastes                  | Confessor                      | November 27 | X   |   |   | E | E |
| James Intercisus                     | Martyr                         | November 27 |     | X |   |   | E |
| Stephen                              |                                | November 28 |     | X |   |   |   |



|                                   |                                         |             |     |   |   |   |   |
|-----------------------------------|-----------------------------------------|-------------|-----|---|---|---|---|
| Saturninus                        | Abbot of Augencio, Martyr               | November 29 | X t |   | X |   |   |
| Saturninus and Honestus           | Bishop, Martyr                          | November 29 | X   |   |   |   |   |
| Saturninus and Sisinius           | Martyr                                  | November 29 |     |   |   | X | X |
| Amon                              | Hermit                                  | November 29 |     | X |   |   |   |
| Paphuncius                        | Hermit                                  | November 29 |     | X |   |   |   |
| Andrew                            | Apostle                                 | November 30 | X t |   | X | X | X |
| Edmund Campion                    | SJ                                      | December 1  |     | X |   |   |   |
| Bibiana                           | Virgin, Martyr                          | December 2  | X t |   | X | X | X |
| Francis Xavier                    | SJ                                      | December 2  |     | X |   |   | E |
| Peter Chrysologus                 | Archbishop of Ravenna, Confessor        | December 3  |     | X |   |   | E |
| Barbara                           | Virgin, Martyr                          | December 4  | X t |   | X | X | X |
| Sabba                             | Abbot                                   | December 5  | X t |   | X | X | X |
| Gerald                            | Bishop, Confessor                       | December 5  | X   |   |   |   |   |
| Nicholas                          | Bishop, Confessor                       | December 6  | X t |   | X | X | X |
| Asela                             | Virgin                                  | December 6  |     |   |   |   | E |
| Ambrose                           | Bishop, Doctor of the Church, Confessor | December 7  | X t |   | X | X | X |
| Conception of Our Lady            |                                         | December 8  | X t |   | X | X | X |
| Leocadia                          | Virgin, Martyr                          | December 9  | X   |   | X | X | X |
| Melchiades                        | Pope, Martyr                            | December 10 | X t |   | X | X | X |
| Eulalia de Merida                 | Virgin, Martyr                          | December 10 | X   |   |   | E | E |
| Carphorus and Abundius            | Martyr                                  | December 10 | X   |   |   |   |   |
| Menas, Hermogenes, and Eugraphius | Martyr                                  | December 10 |     | X |   |   |   |
| Damasus                           | Pope, Confessor                         | December 11 | X t |   | X | X | X |

|                             |                                               |             |     |   |   |   |   |
|-----------------------------|-----------------------------------------------|-------------|-----|---|---|---|---|
| Eutichius                   |                                               | December 11 | X   |   |   |   |   |
| Daniel Stylites             | Confessor                                     | December 11 |     | X |   |   |   |
| Hermogenes and Donatus      | Martyr                                        | December 12 | X   |   |   |   |   |
| Lucy                        | Virgin, Martyr                                | December 13 | X t |   | X | X | X |
| Judocus                     | Confessor                                     | December 13 |     | X |   |   |   |
| Nicasius                    | Bishop, Martyr                                | December 14 | X   |   |   |   |   |
| Spiridon                    | Bishop, Confessor                             | December 14 |     | X |   |   | E |
| Eusebius of Vercelli        | [Bishop]                                      | December 15 |     |   |   | X | X |
| Lazarus                     | Brother of Martha and Mary, Bishop, Confessor | December 17 |     | X |   |   |   |
| Expectation of Our Lady     | Por otro nombre de la O                       | December 18 | X   |   | X | X | X |
| Domingo de Silos            | Confessor                                     | December 20 | X   |   |   |   | E |
| Thomas                      | Apostle                                       | December 21 | X t |   | X | X | X |
| Don Gonzalo Ruíz de Toledo  |                                               | December 21 |     | X |   |   |   |
| Fray Pedro Nicolás Factór   | OFM                                           | December 23 |     | X |   |   |   |
| Servulus                    | Paralyzed Beggar, Confessor                   | December 23 |     |   |   |   | E |
| Christmas                   |                                               | December 25 | X   |   | X | X | X |
| Anastasia                   | Martyr                                        | December 25 | X t |   | X | X | X |
| Eugenia                     | Virgin, Martyr                                | December 25 | X   |   |   |   |   |
| Fray Jacoponus              | OFM                                           | December 25 |     | X |   |   |   |
| Stephen                     | Protomartyr                                   | December 26 | X t |   | X | X | X |
| John                        | Evangelist                                    | December 27 | X t |   | X | X | X |
| Holy Innocents              | Martyr                                        | December 28 | X t |   | X | X | X |
| Indes, Domna, and the 20000 | Martyr                                        | December 28 |     | X |   |   |   |

|                                      |                 |             |     |   |   |   |   |
|--------------------------------------|-----------------|-------------|-----|---|---|---|---|
| Thomas of Canterbury                 | Martyr          | December 29 | X t |   | X | X | X |
| Translation of St. James the Greater |                 | December 30 |     |   | X | X | X |
| Sylvester                            | Pope, Confessor | December 31 | X t | X | X | X | X |
| Barbacianus                          | Confessor       | December 31 |     | X |   |   |   |
| Melana                               | Roman Midwife   | December 31 |     |   |   |   | E |
